# Supplementary material for: RIM is essential for stimulated but not spontaneous somatodendritic dopamine release in the midbrain
Source: eLife journal article supplement (doi:10.7554/elife.47972), 2019-09-05
Supplement: supp [file elife-47972-supp-v1.zip]

Archive with 5 entries (5 files):
- elife_poa_e47972_Figure_1_figure_supplement_2.pdf
- elife_poa_e47972_Figure_2_figure_supplement_1.pdf
- elife_poa_e47972_Transparent_Reporting_File.pdf
- elife_poa_e47972_Figure_1_figure_supplement_3.pdf
- elife_poa_e47972_Figure_1_figure_supplement_1.pdf
