# Supplementary figures and images for: RIM is essential for stimulated but not spontaneous somatodendritic dopamine release in the midbrain
Source: eLife journal article supplement (doi:10.7554/elife.47972), 2019-09-05

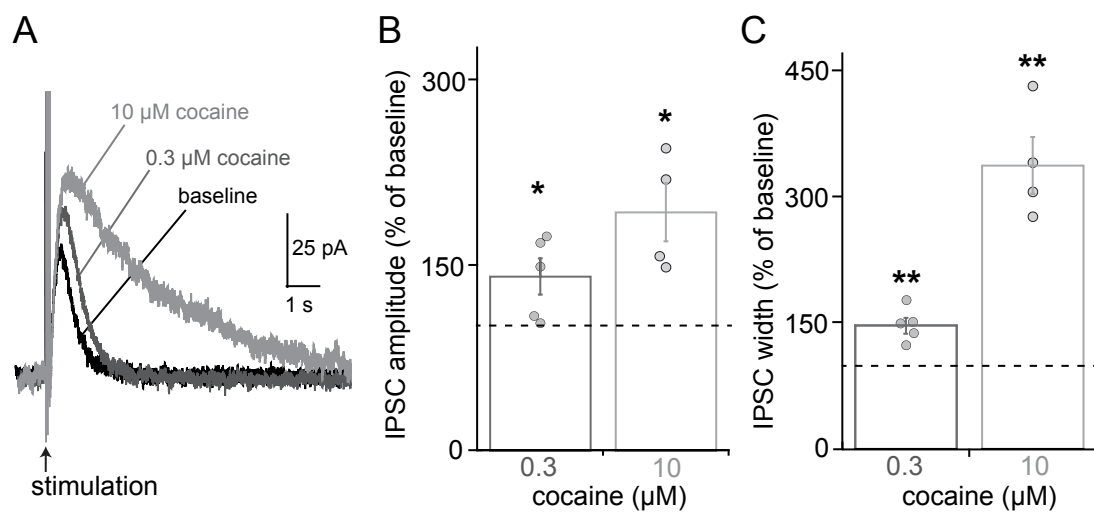

Robinson et al., Figure 1 - figure supplement 2

Supplement: supp [file elife-47972-supp-v1.zip]

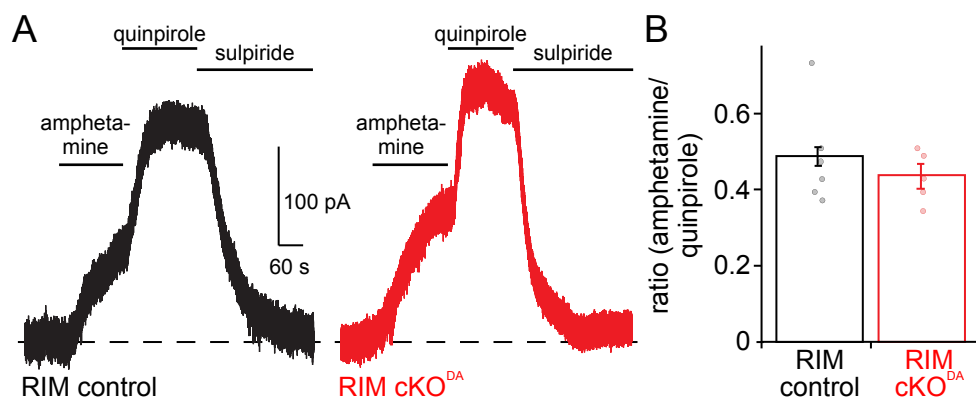

Robinson et al., Figure 2 - figure supplement 1

Supplement: supp [file elife-47972-supp-v1.zip › elife_poa_e47972_Figure_2_figure_supplement_1.pdf]

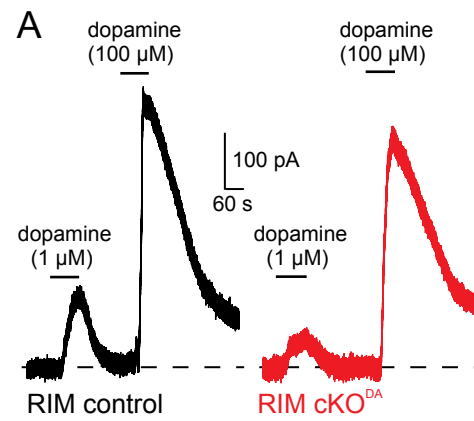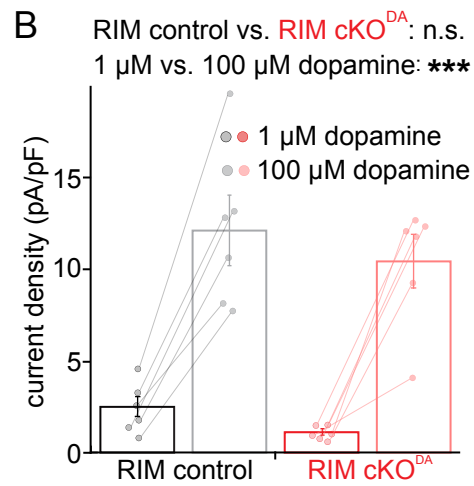

Robinson et al., Figure 1 - figure supplement 3

Supplement: supp [file elife-47972-supp-v1.zip › elife_poa_e47972_Figure_1_figure_supplement_3.pdf]

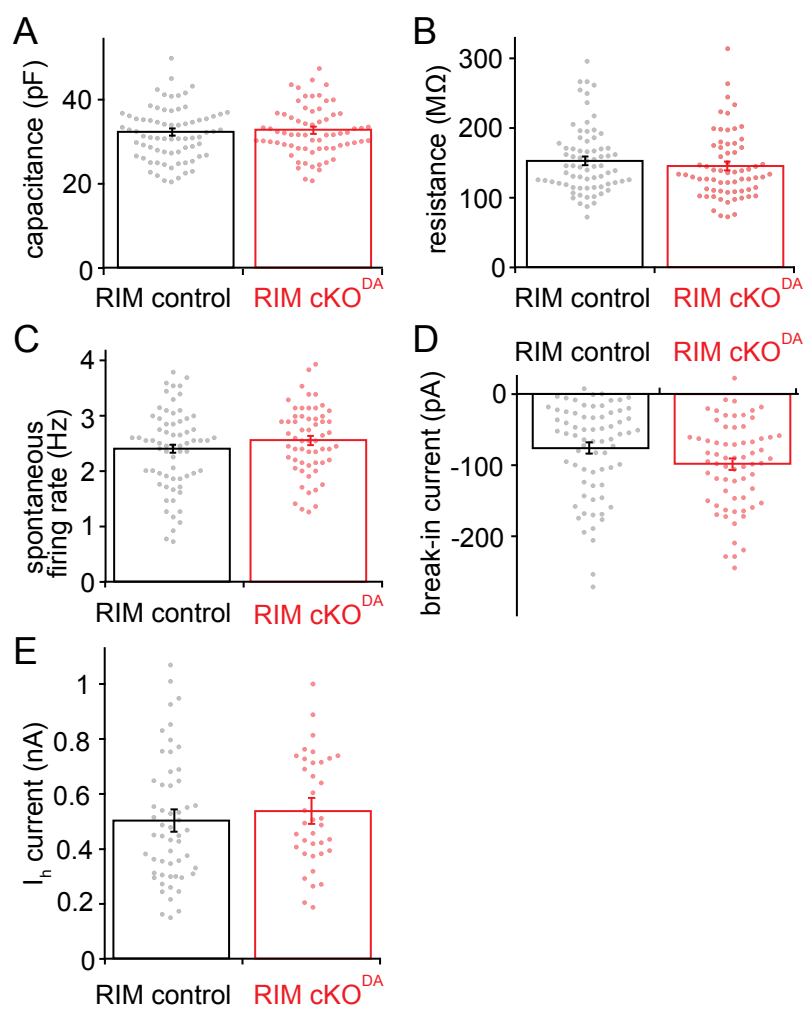

Robinson et al., Figure 1 - figure supplement 1

Supplement: supp [file elife-47972-supp-v1.zip › elife_poa_e47972_Figure_1_figure_supplement_1.pdf]
